# Supplementary material for: A novel electrically controllable volatile memory device based on few-layer black phosphorus
Source: Royal Society of Chemistry journal article supplement (doi:10.1039/c7tc05083f), 2018-01-01
Supplement: c7tc05083f1.pdf [file c7tc05083f1.pdf]

# Supplementary Information: Journal of Materials Chemistry C: A novel electrically controllable volatile memory device based on few-layer black phosphorus

Liwen Zhang,<sup>a,b,e</sup> Zhizhou Yu,<sup>c</sup> Lei Zhang,<sup>a,b,e,\*</sup> Xiaohong Zheng,<sup>d,†</sup> Liantuan Xiao,<sup>a,e</sup> Suotang Jia,<sup>a,e</sup> Jian Wang<sup>b</sup>

In this supplementary material, we will show further transport properties details of our proposed model.

Figure 1 presents the LDOS at the Fermi level versus Z direction when different vertical gates are applied. It is clear that the LDOS mainly localizes in the topmost or bottom layers and becomes larger as the gate voltage increases.

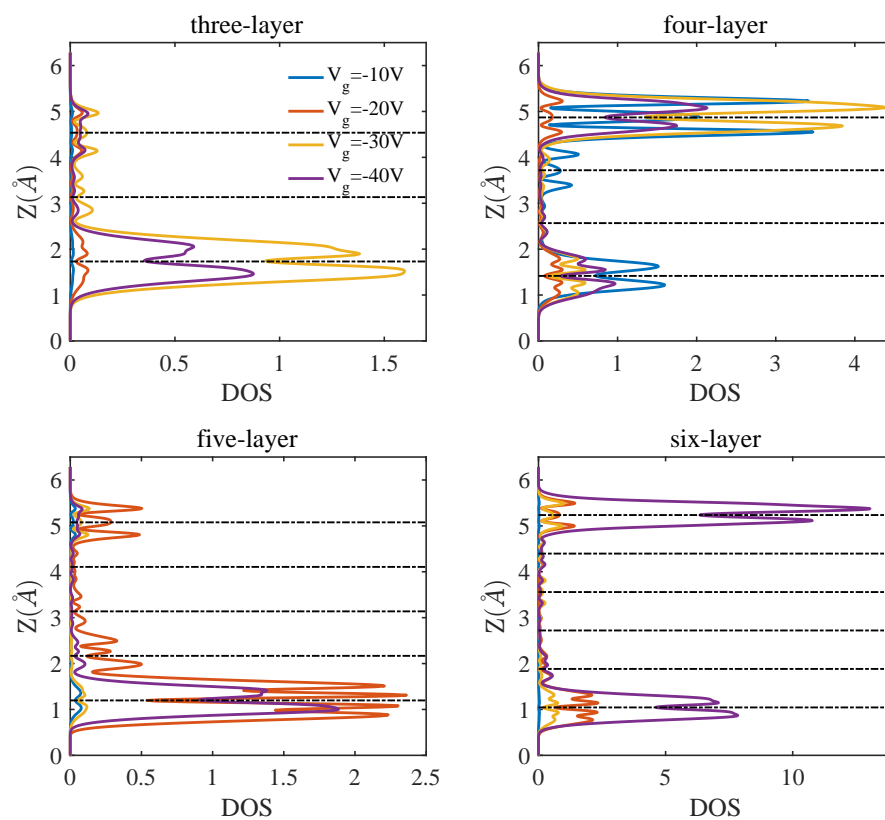

**Figure 1** The LDOS at Fermi level when different vertical gate voltages are applied in electrode. The horizontal dashed-dot black lines represent the central atomic position of each layer.

<sup>a</sup>State Key Laboratory of Quantum Optics and Quantum Optics Devices, Institute of Laser Spectroscopy, Shanxi University, Taiyuan 030006, China

<sup>b</sup>Department of Physics and The Center of Theoretical and Computational Physics, The University of Hong Kong, Pokfulam Road, Hong Kong, China

<sup>c</sup>School of Physics and Technology, Nanjing Normal University, Nanjing 210023, China

<sup>d</sup>Key Laboratory of Materials Physics, Institute of Solid State Physics, Chinese Academy of Sciences, Hefei 230031, China

<sup>e</sup>Collaborative Innovation Center of Extreme Optics, Shanxi University, Taiyuan 030006, China

\*zhanglei@sxu.edu.cn

†xhzheng@theory.issp.ac.cn
